# Supplementary material for: Comprehensive Constitutional Genetic and Epigenetic Characterization of Lynch-Like Individuals
Source: MDPI journal article supplement (doi:10.3390/cancers12071799), 2020-07-05

# A. Case 74

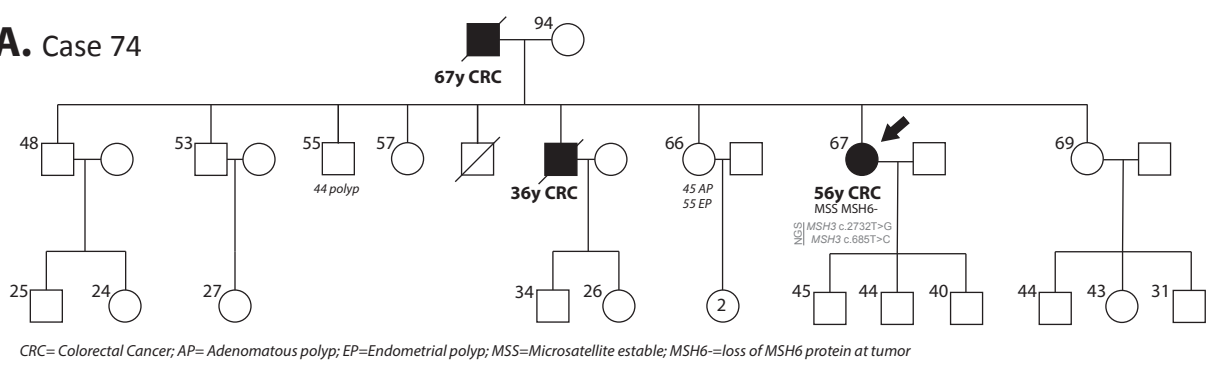

# B. MSH3 c.685T>C (p.Y229H)

# MSH3 c.2732T>G (p.L911W)

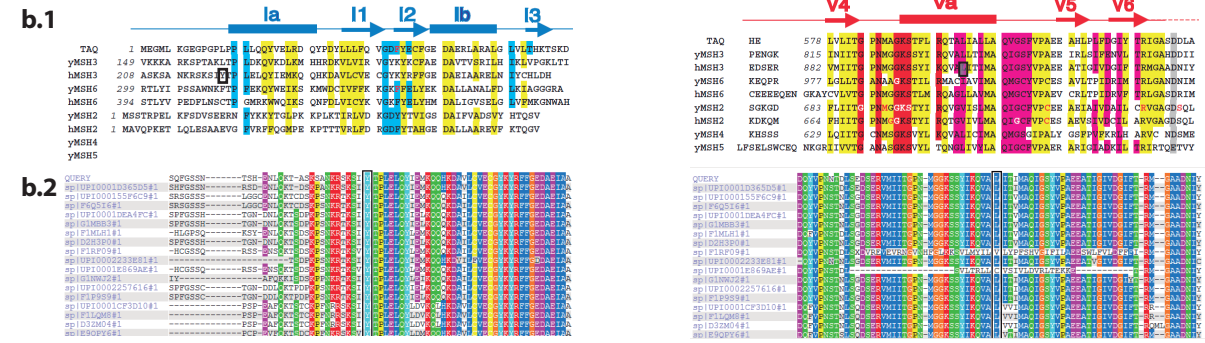

# C. Case 74

# CRC control without familial cancer history

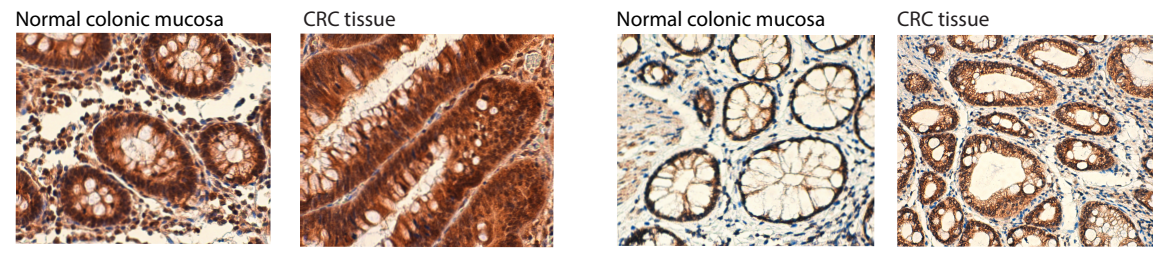

# D. Case74 Blood DNA

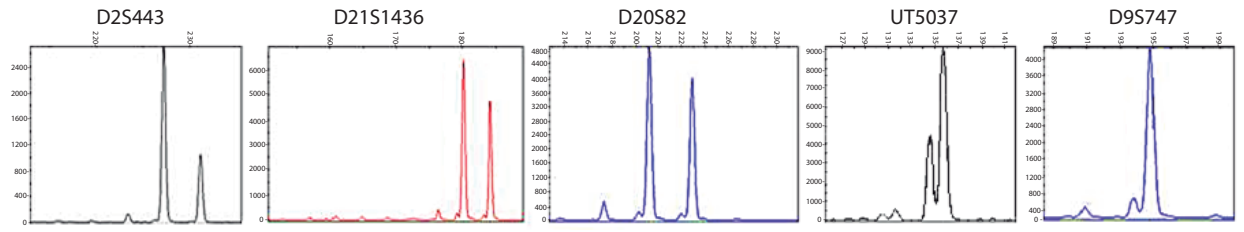

# Case 74 FFPE TUMOR DNA

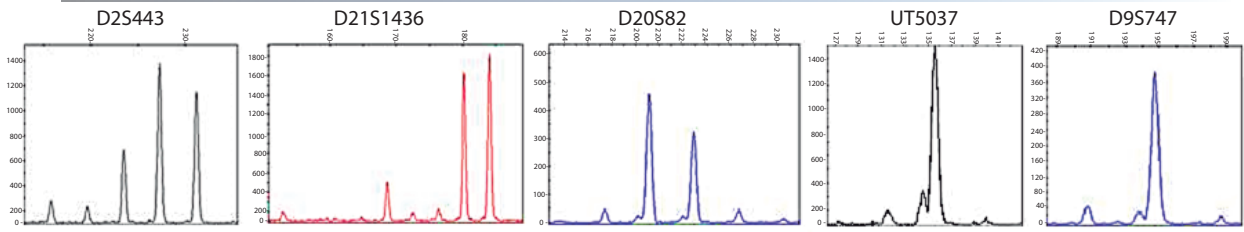

Supplement: s1 [file s1]
