# Supplementary material for: Comprehensive Constitutional Genetic and Epigenetic Characterization of Lynch-Like Individuals
Source: MDPI journal article supplement (doi:10.3390/cancers12071799), 2020-07-05
Supplement: s1 [file s1]

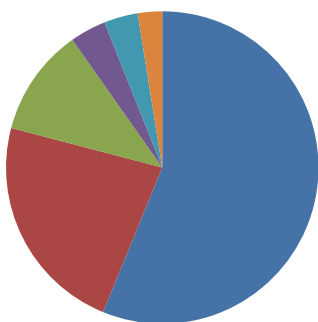

| Mutational signature | Contribution (%) | Proposed etiology                                             |
|----------------------|------------------|---------------------------------------------------------------|
| Signature 6          | 56,19            | Defective DNA mismatch repair                                 |
| Signature 1          | 22,89            | Deamination of 5-methylcytosine (present in all cancer types) |
| Signature 16         | 11,16            | -                                                             |
| Signature 26         | 3,73             | Defective DNA mismatch repair                                 |
| Signature 12         | 3,51             | -                                                             |
| Signature 7          | 2,52             | UV exposure                                                   |
