# Supplementary figures and images for: Comprehensive Constitutional Genetic and Epigenetic Characterization of Lynch-Like Individuals
Source: MDPI journal article supplement (doi:10.3390/cancers12071799), 2020-07-05

**A. AF1** (*MSH6* c.1153\_1155delAGG)

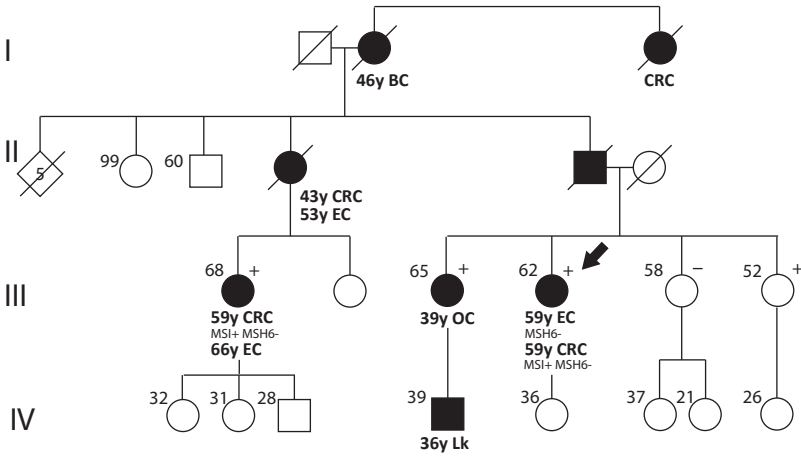

**B. AF2** (*MSH6* c.3150\_3161dup)

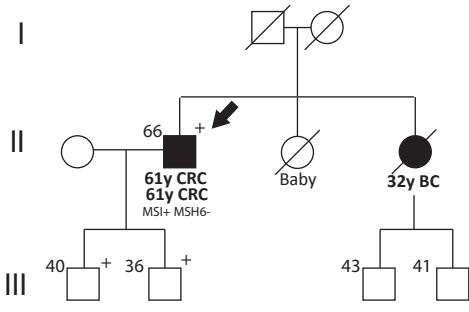

**C. AF3** (*MSH6* c.3150\_3161dup)

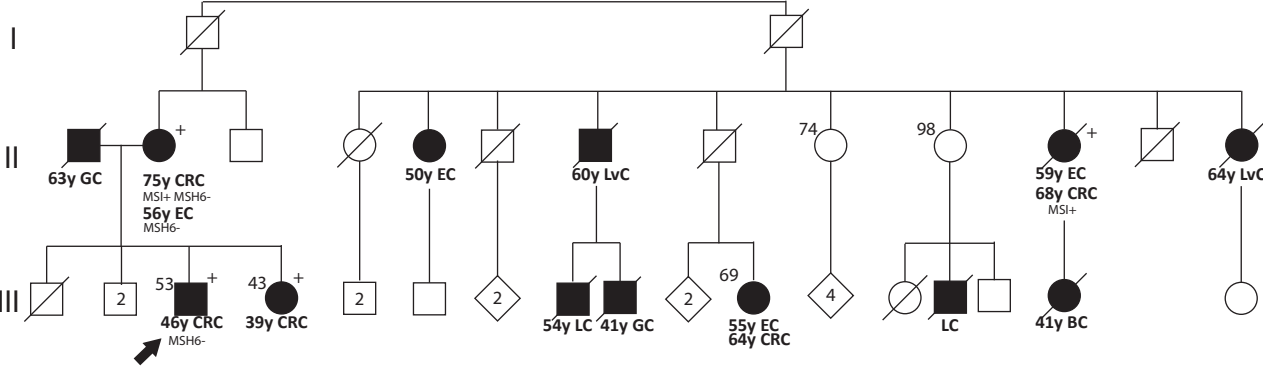

Supplement: s1 [file s1]

# A

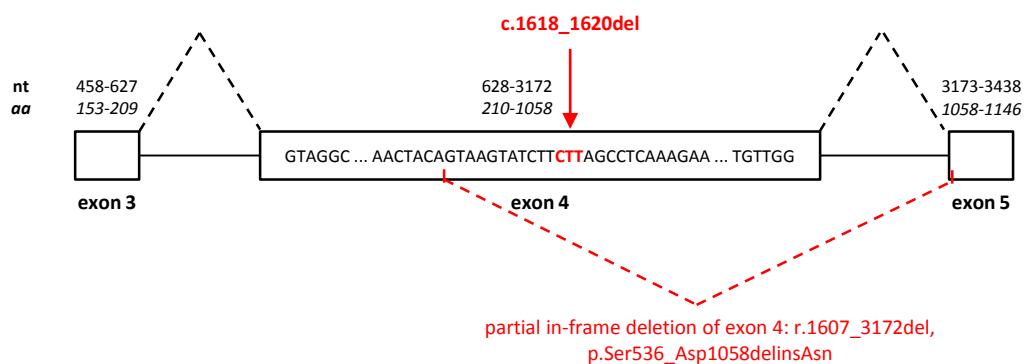

# B

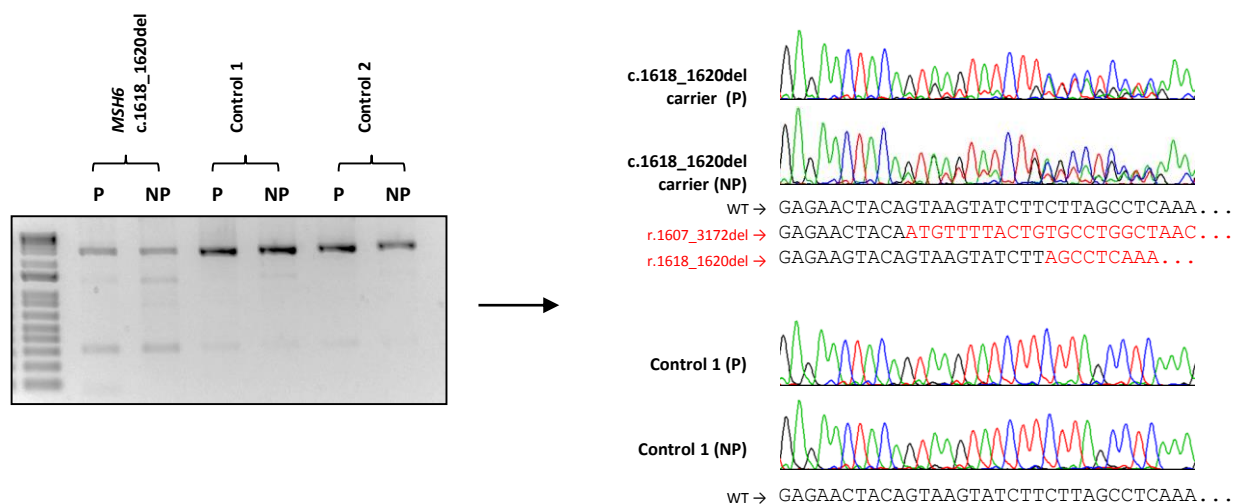

Supplement: s1 [file s1]

**A.**

CpG islands:

Ref.Genes:

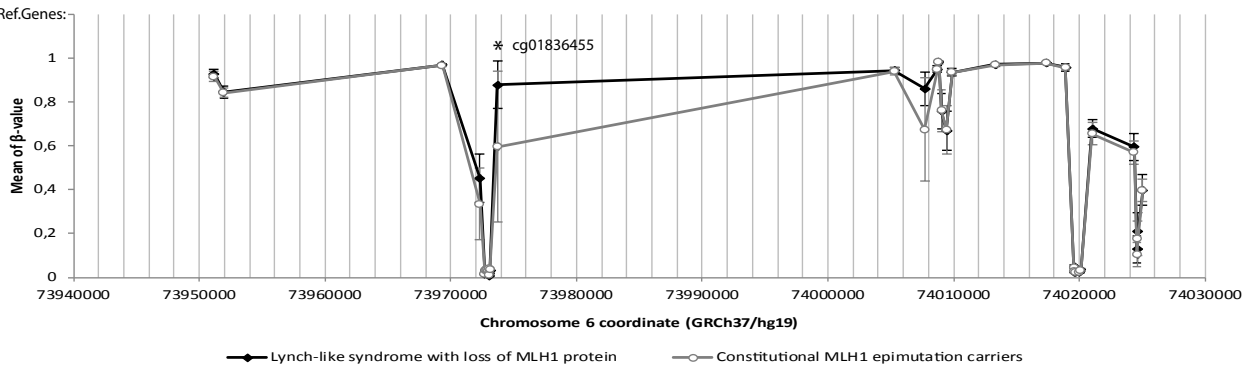**B.**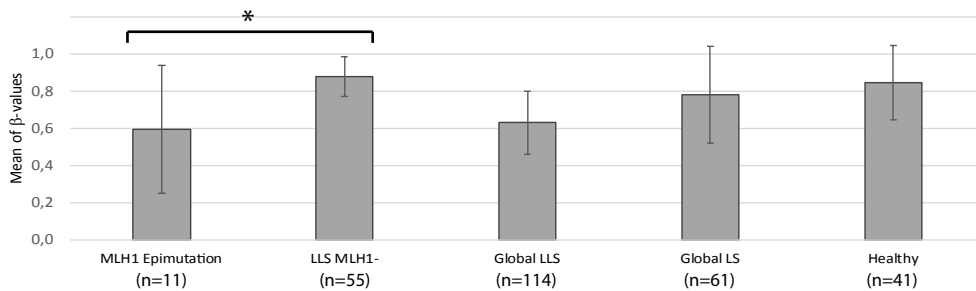

Supplement: s1 [file s1]

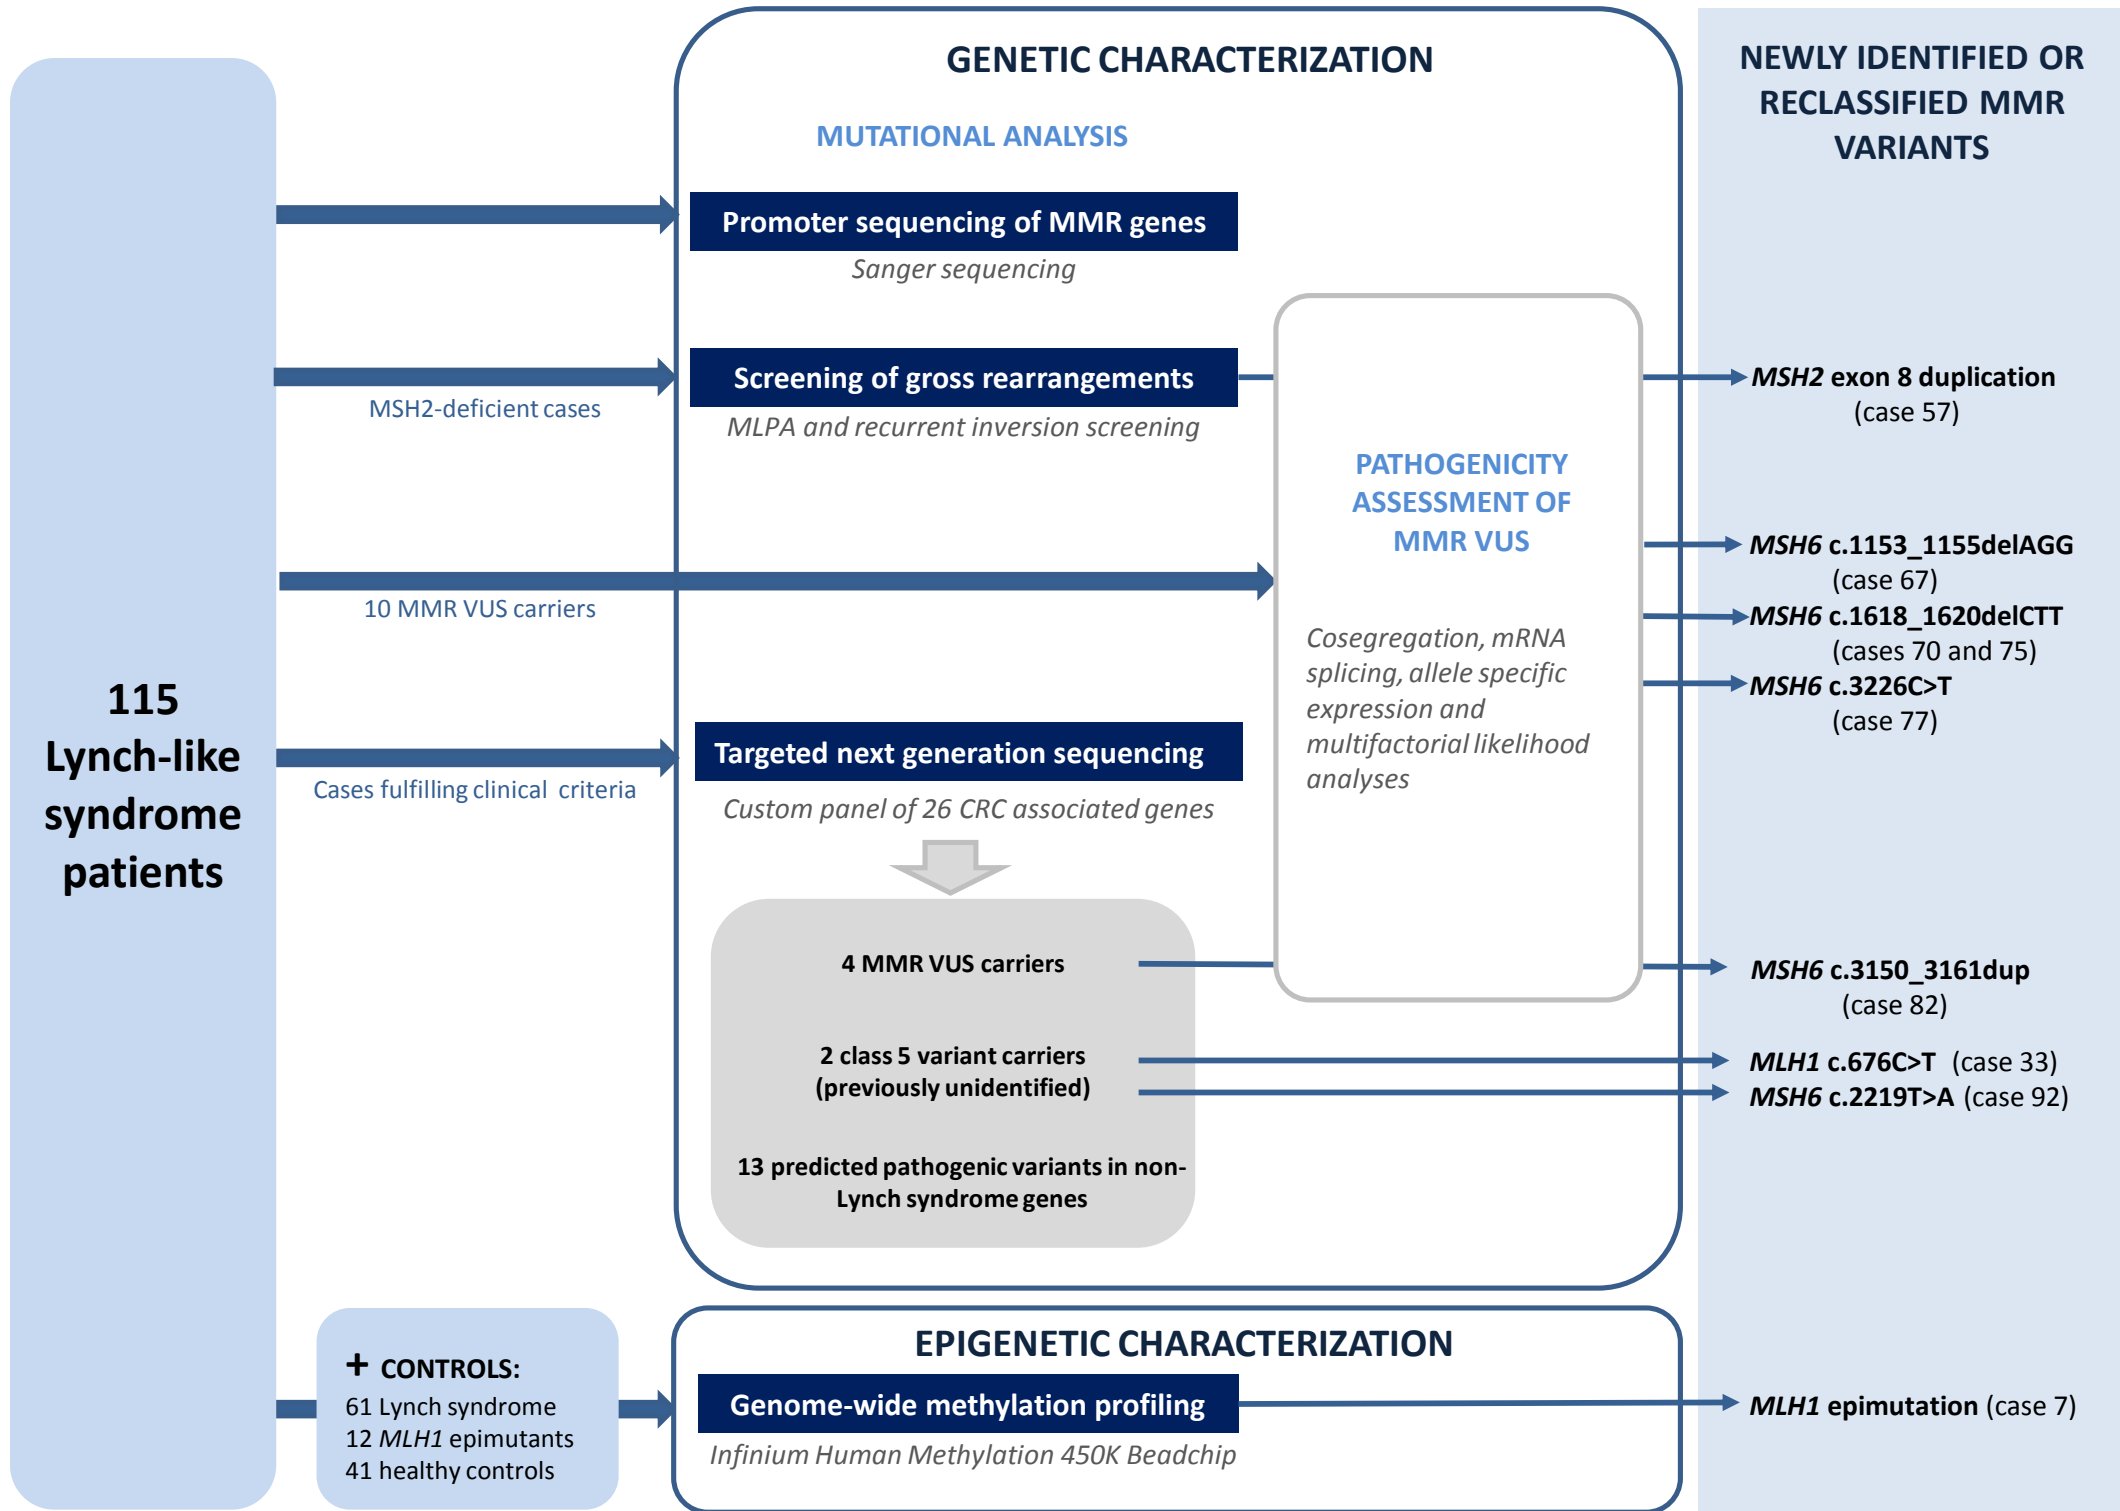

Supplement: s1 [file s1]

# A

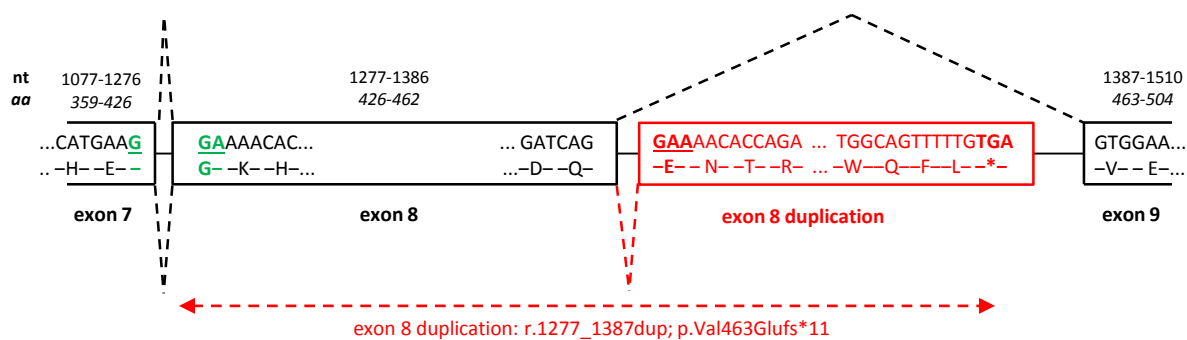

# B

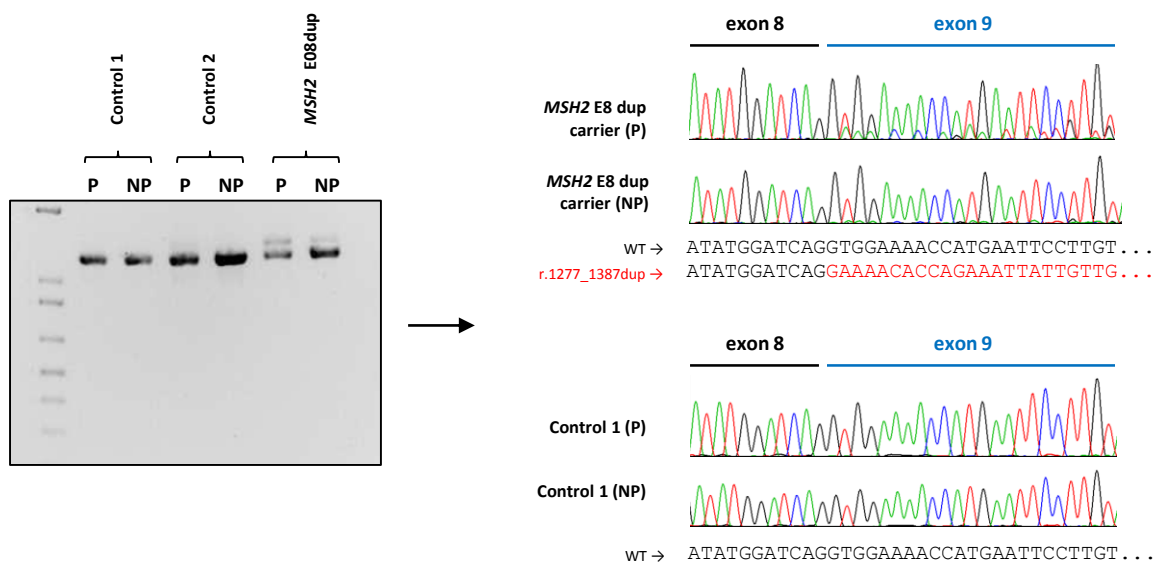

Supplement: s1 [file s1]
